# Supplementary material
Source: publisher site journal article supplement (https://www.spandidos-publications.com/5008/downloadSupplementary)

Figure S1. Necropsy results for C57BL/6 mice treated with mono-EGF-IT, bi-EGF-IT, or bis-EGF/IL2-IT in the absence of tumor inoculation. C57BL/6 mice were treated with mono-EGF-IT (n=10), bi-EGF-IT (n=6), or bis-EGF/IL2-IT (n=6). Mice were euthanized on day 13 after the first injection of the fusion toxins. (A) Body weight of mice was recorded and plotted along the observation period. (B) Gross changes in the abdominal cavity are shown. IT, immunotoxin.

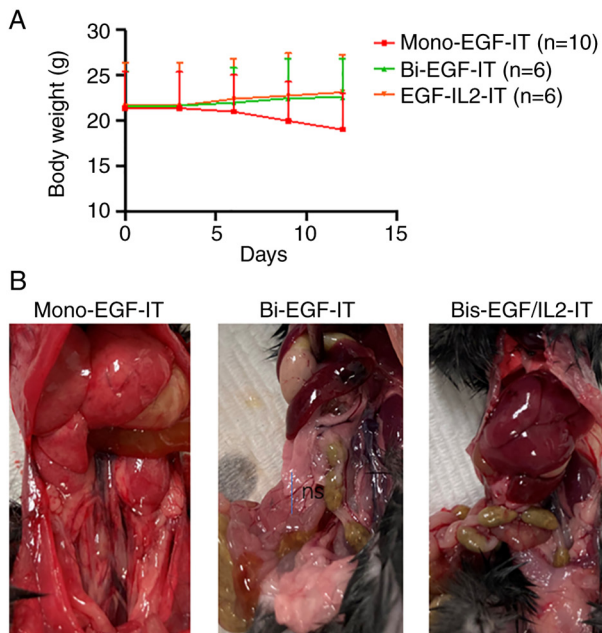

Supplement: Supplementary file 1 [file downloadSupplementary]
